# Supplementary material for: LPEATs Tailor Plant Phospholipid Composition through Adjusting Substrate Preferences to Temperature
Source: MDPI journal article supplement (doi:10.3390/ijms22158137), 2021-07-29
Supplement: s1 [file s1]

## Supplementals

**Supplemental Table S1.** Percentage of amino acid similarity between CsLPEAT1a isoform variants (A) and CsLPEAT2 isoforms (B).

| <b>A</b>    | CsLPEAT1a.1 | CsLPEAT1a.2 |
|-------------|-------------|-------------|
| CsLPEAT1a.1 |             | 99.24%      |
| CsLPEAT1a.2 | 99.24%      |             |

| <b>B</b>  | CsLPEAT2a | CsLPEAT2b | CsLPEAT2c |
|-----------|-----------|-----------|-----------|
| CsLPEAT2a |           | 98.17%    | 98.17%    |
| CsLPEAT2b | 98.17%    |           | 97.61%    |
| CsLPEAT2c | 97.61%    | 97.61%    |           |

**Supplemental Table S2.** Primers used to amplify CsLPEAT genes, later cloned into the Gateway system. attB1 fragments of forward primers and attB2 fragments of reverse primers are underlined

| Gene-of-Interest | Primer Role | Primer Sequence (5' to 3')                                         |
|------------------|-------------|--------------------------------------------------------------------|
| CsLPEAT1         | forward     | <u>GGGGACAAGTTTGTACAAAAAAGCAGGCT</u> GTGTTTACCTTT<br>TACGGCGAATCTA |
|                  | reverse     | <u>GGGGACCACTTTGTACAAGAAAGCTGGGT</u> TCGTGTAATCAA<br>ACATTTGGCTTTT |
| CsLPEAT2         | forward     | <u>GGGGACAAGTTTGTACAAAAAAGCAGGCT</u> ACATTCGACCAC<br>AAAGCAAAAAGGC |
|                  | reverse     | <u>GGGGACCACTTTGTACAAGAAAGCTGGGT</u> AAAGTTTGCTCA<br>GAACTAGAGG    |

**Supplemental Table S3.** Primers used in RT-qPCR analysis.

| Gene-of-Interest | Reference Sequence | Primer Role | Primer Sequence (5' to 3') |
|------------------|--------------------|-------------|----------------------------|
| CsACT2           | XM 010489499.1     | forward     | ACAATTTCCCGCTCTGCTGTTGTG   |
| CsACT2           | XM 010489499.1     | reverse     | AGGGTTTCTCTCTTCCACATGCCA   |
| CsTIP41          | XM 019233743.1     | forward     | TTGGCGAGAATGCATTAGTCCTT    |
| CsTIP41          | XM 019233743.1     | reverse     | ATTGTCGGCCAGTTCATCTTCATA   |
| CsLPEAT1a        | XM 010431575.2     | forward     | GACGACGACGACGAGAAA         |

|           |                |         |                           |
|-----------|----------------|---------|---------------------------|
| CsLPEAT1a | XM_010431575.2 | reverse | TAAATGAAAGAAAGGGCTTCAG    |
| CsLPEAT1b | XM_010419341.2 | forward | AAAGCTGAAATCTTCACGG       |
| CsLPEAT1b | XM_010419341.2 | reverse | CAAAGAAAGAAAGGGGCTT       |
| CsLPEAT1c | XM_010474544.2 | forward | CTAGAGACGACGAGGAGGAG      |
| CsLPEAT1c | XM_010474544.2 | reverse | CTCTGATTCCATTGTTCTTCTTCTA |
| CsLPEAT2a | XM_010519887.1 | forward | AAGCAAAAAGGCTGTGTCAATC    |
| CsLPEAT2a | XM_010519887.1 | reverse | TTCTGGTTGATCGACGGATGG     |
| CsLPEAT2b | XM_010509827.2 | forward | TGATCCATCATCAACCAGAG      |
| CsLPEAT2b | XM_010509827.2 | reverse | AAGAACAGGAGGCTCTGT        |
| CsLPEAT2c | XM_010508235.2 | forward | AGCAAAAAGGCTGTGAGTAC      |
| CsLPEAT2c | XM_010508235.2 | reverse | TGGATGATTGATGATGGATCAAC   |

**Supplemental Table S4.** List of reference sequences used for sequence alignments and evolutionary analyses.

| Gene Denotation    | Reference Sequence | Species of Origin           |
|--------------------|--------------------|-----------------------------|
| CsLPEAT1b          | XM_010419341.2     | <i>Camelina sativa</i>      |
| CsLPEAT1c          | XM_010474544.2     | <i>Camelina sativa</i>      |
| <i>At</i> LPEAT1   | AT1G80950.1        | <i>Arabidopsis thaliana</i> |
| <i>At</i> LPEAT1   | XP_020889625.1     | <i>Arabidopsis lyrata</i>   |
| <i>Bn</i> LPEAT1.1 | XP_013702411.1     | <i>Brassica napus</i>       |
| <i>Bn</i> LPEAT1.2 | XP_013648598.1     | <i>Brassica napus</i>       |
| <i>Bo</i> LPEAT1   | XP_013591940.1     | <i>Brassica oleracea</i>    |
| <i>Br</i> LPEAT1   | XP_009104503.2     | <i>Brassica rapa</i>        |
| <i>Es</i> LPEAT1   | XP_006389853.1     | <i>Eutrema salsugineum</i>  |
| <i>Rs</i> LPEAT1   | XP_018457802.1     | <i>Raphanus sativus</i>     |
| CsLPEAT2a          | XM_010519887.1     | <i>Camelina sativa</i>      |
| CsLPEAT2b          | XM_010509827.2     | <i>Camelina sativa</i>      |
| CsLPEAT2c          | XM_010508235.2     | <i>Camelina sativa</i>      |
| <i>At</i> LPEAT2   | AT2G45670.1        | <i>Arabidopsis thaliana</i> |
| <i>At</i> LPEAT2   | XP_002882025.1     | <i>Arabidopsis lyrata</i>   |
| <i>Bn</i> LPEAT2.1 | XP_013734815.1     | <i>Brassica napus</i>       |
| <i>Bn</i> LPEAT2.2 | XP_022571765.1     | <i>Brassica napus</i>       |
| <i>Bo</i> LPEAT2   | XP_013631253.1     | <i>Brassica oleracea</i>    |
| <i>Br</i> LPEAT2   | XP_009133738.1     | <i>Brassica rapa</i>        |
| <i>Es</i> LPEAT2   | XP_006397746.1     | <i>Eutrema salsugineum</i>  |
| <i>Rs</i> LPEAT2   | XP_018484721.1     | <i>Raphanus sativus</i>     |

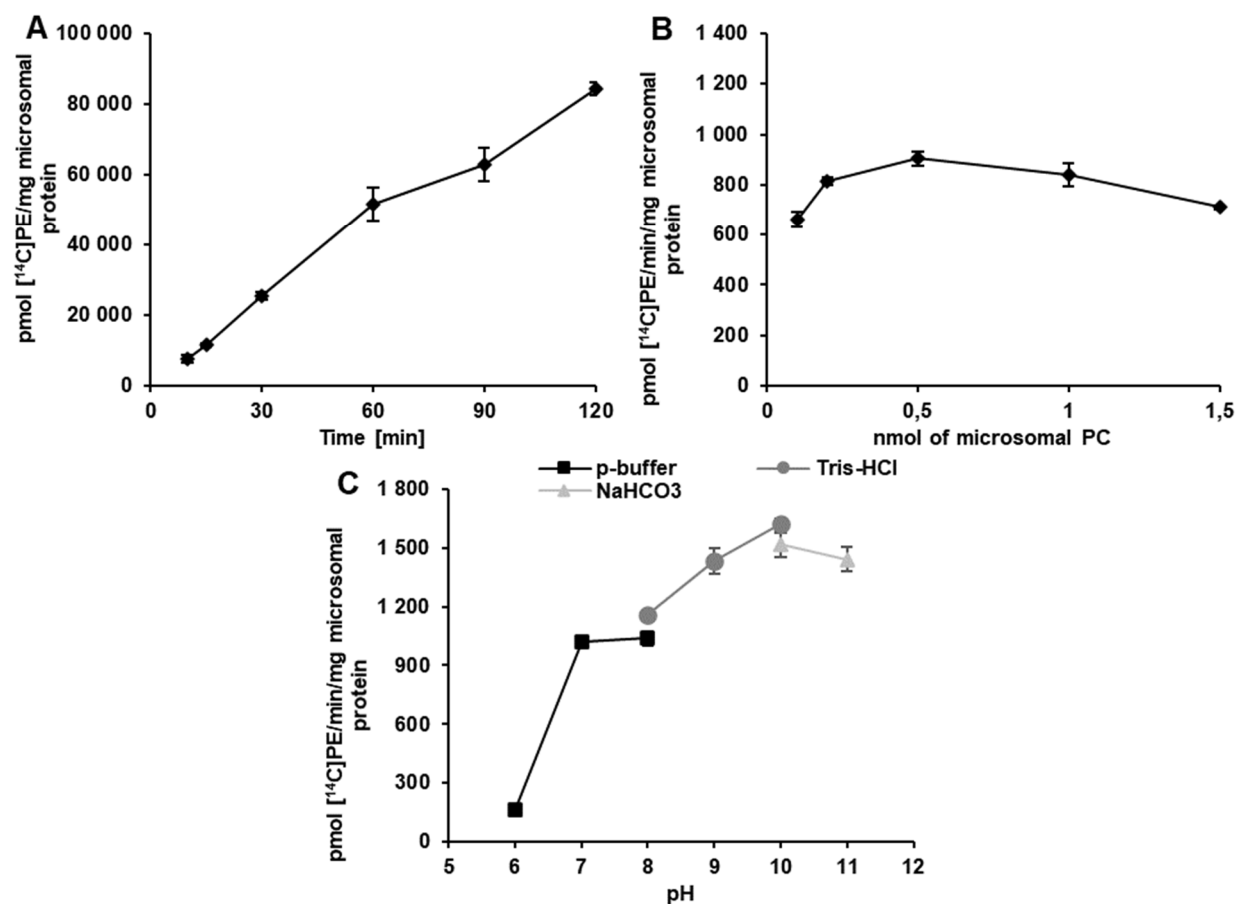

**Supplemental Figure S1.** Effects of various factors on the activity of acyl-CoA:lysophosphatidylethanolamine acyltransferases (LPEATs) of *Camelina sativa* *in vivo* leaves. A – time dependency; B – microsomal content dependency; C - pH dependency. Mean values and SD are presented (data from at least three independent assays).

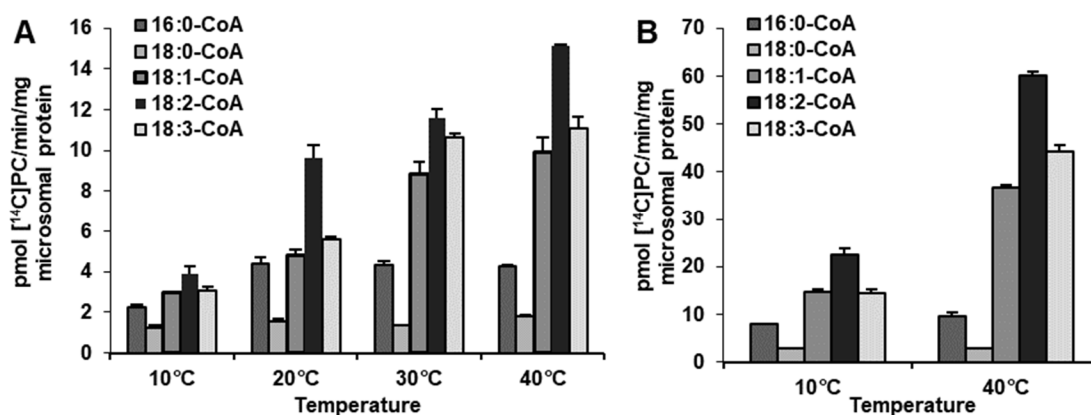

**Supplemental Figure S2.** Activity of acyl-CoA:lysophosphatidylcholine acyltransferases (LPCATs) present in microsomal fraction of *Camelina sativa* tissues towards five various acyl-CoAs at different temperatures. (A – *in vivo* leaves; B – *in vitro* roots). Mean values and SD are presented (data from at least three independent assays).

|                      |                     |                     |                     |                     |                     |                     |                     |                     |                     |     |
|----------------------|---------------------|---------------------|---------------------|---------------------|---------------------|---------------------|---------------------|---------------------|---------------------|-----|
| <i>At</i> LPEAT1     | M E S E L K D L N S | N S N P P S S K E E | R P L L K S E S D L | A A A I E E L D K K | F A P Y A R T D L Y | G T M G L G P F P M | T E N I K L A V A L | V T L V P L R F L L | S M S L L L L Y Y I | 90  |
| <i>Cs</i> LPEAT1a.1  | M E S E L K D M N S | N - - P P S S K E E | R P L L K S E S D L | A A A I E E L D K K | F A P Y A R T D L Y | G T M G L G P F P M | T E K I K L A V A M | V T L V P L R F L L | S M S L L L L Y Y I | 88  |
| <i>Cs</i> LPEAT1a.2  | M E S E L K D M N S | N - - P P S S E E E | R P L L K S E S D L | A A A I E E L D K K | F A P Y A R T D L Y | G T M G L G P F P M | T E K I K L A V A M | V T L V P L R F L L | S M S L L L L Y Y I | 88  |
| <i>Cs</i> LPEAT1b    | M E S E L K D M N S | N - - P P S S K E E | R P L L K S E S D L | A A A I E E L D K K | F A P Y A R T D L Y | G T M G L G P F P M | T E K I K L A V A M | V T L V P L R F L L | S M S L L L L Y Y I | 88  |
| <i>Cs</i> LPEAT1c    | M E S E L K D M N S | N - - P P S S K E E | R P L L K S E S D L | A A A I E E L D K K | F A P Y A R T D L Y | G T M G L G P F P M | T E K I K L A V A M | V T L V P L R F L L | S M S L L L L Y Y I | 88  |
| <i>At</i> LPEAT1     | I C R V F T L F S A | P Y R G P E E E E E | E G G V V F Q E D Y | A H M E G W K R T V | I V R S G R F L S R | V L L F V F G F Y W | I H E S C P D R D S | D M D S N P K T T S | T E I N Q K G E A A | 180 |
| <i>Cs</i> LPEAT1a.1  | I C R L F T L F S A | P Y R G A E E E E E | E G G V V V Q E D Y | A H M R G W K R T V | I V S C G R F L S R | V L L F V F G F Y W | I H E T R L D R D S | L M D P N P K T T S | A E I S Q K G D A A | 178 |
| <i>Cs</i> LPEAT1a.2  | I C R L F T L F S A | P Y R G A E E E E E | E G A V V V Q E D Y | A H M R G W K R T V | I V S C G R F L S R | V L L F V F G F Y W | I H E T R L D R D S | L M D P N P K T T S | A E I S Q K G D A A | 178 |
| <i>Cs</i> LPEAT1b    | I C R L F T L F S A | P Y R G A E E E E E | E G A V V V Q E D Y | A H M R G W K R T V | I V S C G R F L S R | V L L F V F G F Y W | I H E T R L D R D S | L M D P N P K T T S | A E I S Q K G D A A | 178 |
| <i>Cs</i> LPEAT1c    | I C R L F T L F S A | P Y R G A E E E E E | E G G V V V Q E D Y | A H M R G W K R T V | I V S C G R F L S R | V L L F V F G F Y W | I H E T R L D R D S | L M D P N P K T T S | V E I S Q K G D A A | 178 |
|                      |                     | ▽                   | ▽                   | ▽                   | ▽                   |                     |                     |                     |                     |     |
| <i>At</i> LPEAT1     | T E E P E R P G A I | V S N H V S Y L D I | L Y H M S A S F P S | F V A K R S V G K L | P L V G L I S K C L | G C V Y V Q R E A K | S P D F K G V S G T | V N E R V R E A H S | N K S A P T I M L F | 270 |
| <i>Cs</i> LPEAT1a.1  | T E E P E R P G A I | V S N H V S Y L D I | L Y H M S A S F P S | F V A K R S V G K L | P L V G L I S K C L | G C V Y V Q R E A K | S P D F K G V S G T | V N E R V R E A H R | N K S A P T I M L F | 268 |
| <i>Cs</i> LPEAT1a.2  | T E E P E R P G A I | V S N H V S Y L D I | L Y H M S A S C P S | F V A K R S V G K L | P L V G L I S K C L | G C V Y V Q R E A K | S P D F K G V S G T | V N E R V R E A H R | N K S A P T I M L F | 268 |
| <i>Cs</i> LPEAT1b    | T E E P E R P G A I | V S N H V S Y L D I | L Y H M S A S F P S | F V A K R S V G K L | P L V G L I S K C L | G C V Y V Q R E A K | S P D F K G V S G T | V N E R V R E A H R | N K S A P T I M L F | 268 |
| <i>Cs</i> LPEAT1c    | T E E P E R P G A I | V S N H V S Y L D I | L Y H M S A S F P S | F V A K R S V G K L | P L V G L I S K C L | G C V Y V Q R E A K | S P D F K G V S G T | V N E R V R E A H R | N I S A P T I M L F | 268 |
|                      | ▽                   | ▽                   |                     |                     |                     |                     |                     |                     |                     |     |
| <i>At</i> LPEAT1     | P E G T T T N G D Y | L L T F K T G A F L | A G T P V L P V I L | K Y P Y E R F S V A | W D T I S G A R H I | L F L I C Q V V N H | L E V I R I P V Y Y | P S Q E E K D D P K | L Y A S N V R R I M | 360 |
| <i>Cs</i> LPEAT1a.1  | P E G T T T N G D Y | L L T F K T G A F L | A G T P V L P V I L | K Y P Y E R F S V A | W D T I S G A R H I | L F L I C Q V V N H | L E V I R I P V Y Y | P S Q E E K D D P K | L Y A S N V R R I M | 358 |
| <i>Cs</i> LPEAT1a.2  | P E G T T T N G D Y | L L T F K T G A F L | A G T P V L P V I L | K Y P Y E R F S V A | W D T I S G A R H I | L F L I C Q V V N H | L E V I R I P V Y Y | P S Q E E K D D P K | L Y A S N V R R I M | 358 |
| <i>Cs</i> LPEAT1b    | P E G T T T N G D Y | L L T F K T G A F L | A G T P V L P V I L | K Y P Y E R F S V A | W D T I S G A R H I | L F L I C Q V V N H | L E V I R I P V Y Y | P S Q E E K D D P K | L Y A S N V R R I M | 358 |
| <i>Cs</i> LPEAT1c    | P E G T T T N G D Y | L L T F K T G A F L | A G T P V L P V I L | K Y P Y E R F S V A | W D T I S G A R H I | L F L I C Q V V N H | L E V I R I P V Y Y | P S Q E E K D D P K | L Y A S N V R R I M | 358 |
| <i>At</i> LPEAT1     | A T E G N L I L S E | I G I S D K R I Y H | A T I N G N L S Q T | R D F H Q K E E     |                     |                     |                     |                     |                     |     |
| <i>Cs</i> LPEAT1a.1A | A T E G N L I L S D | I G I G D K R I Y H | A T I N G N L S Q T | R D F H Q K E E     |                     |                     |                     |                     |                     |     |
| <i>Cs</i> LPEAT1a.2A | A T E G N L I L S D | I G I G D K R I Y H | A T I N G N L S Q T | R D F H Q K E E     |                     |                     |                     |                     |                     |     |
| <i>Cs</i> LPEAT1b    | A T E G N L I L S D | I G I G D K R I Y H | A T I N G N L S Q T | R D F H Q K E E     |                     |                     |                     |                     |                     |     |
| <i>Cs</i> LPEAT1c    | A T E G N L I L S D | I G I G D K R I Y H | A T I N G N L S Q T | R D F H Q K E E     |                     |                     |                     |                     |                     |     |

**Supplementary Figure S3.** Amino acid sequences' annotation of *Cs*LPEAT1 isoforms and *At*LPEAT1. LPE-binding site amino acids are denoted by golden arrows above.

|                   |            |            |             |             |            |            |             |            |            |     |
|-------------------|------------|------------|-------------|-------------|------------|------------|-------------|------------|------------|-----|
| <i>At</i> LPEAT2  | MADPDLSPL  | IHHQSS-DQP | EVVISADDD   | DD-----ESG  | LNLLPAVVDP | RYSRGFEFDH | LN-PYGFLSE  | SEPPVIGPTT | VDPFRNNTPG | 83  |
| <i>Cs</i> LPEAT2a | MADPDLSPL  | IHHQPSVDQP | EVVISIGVDD  | DDDDSSSTDG  | LN-LPAAVGV | -YSRGFQFDH | RNNPYGFLSE  | TEPPVIGPTT | VDPFRNNTPG | 88  |
| <i>Cs</i> LPEAT2b | MADPDLSPL  | IHHQPSVDQP | EVVISIGVDD  | DDDDSSSTDG  | LNHLPAAVGV | -YSRGFQFDH | RNNPYGFLSE  | TEPPVIGPTT | VDPFRNNTPG | 84  |
| <i>Cs</i> LPEAT2c | MADPDLSPL  | IHHQSS-DQP | EVVISIGVDD  | DDSSSSSTDG  | LN-LPSAVGV | -VPRGFQFDH | CNNPYGFLSE  | TEPPVIGPTT | VDPFRNNTPG | 88  |
| <i>At</i> LPEAT2  | VSGLYEAKI  | VICLPIALVR | LVLFAASTAV  | GYLATKIALA  | GWKDKENPMP | LWRCRIMWIT | RICTRCILFS  | FGYQWIRRK  | KPARREAP   | 173 |
| <i>Cs</i> LPEAT2a | VFGLYEAKI  | VICLPIALVR | LVLFGASTAV  | GYLATKIALA  | GWKDKENPMP | LWRCRIMWIT | RICTRCILFS  | FGYQWIRRK  | KPARREAP   | 178 |
| <i>Cs</i> LPEAT2b | VFGLYEAKI  | VICLPIALVR | LVLFGASTAV  | GYLATKIALA  | GWKDKENPMP | LWRCRIMWIT | RICTRCILFS  | FGYQWIRRK  | KPARREAP   | 174 |
| <i>Cs</i> LPEAT2c | VFGLYEAKI  | VICLPIALVR | LVLFGASTAV  | GYLATKIALA  | GWKDKENPMP | LWRCRIMWIT | RICTRCILFS  | FGYQWIRRK  | KPARREAP   | 178 |
| <i>At</i> LPEAT2  | VVSNHVSYLE | PIFYFYLESP | TIVASESHDS  | LPFVGTTIRA  | MQVIYVNRFS | QTSRKNAVHE | IKRKASCDRE  | PRLLLFPEGT | TTNGKVLISF | 263 |
| <i>Cs</i> LPEAT2a | VVSNHVSYLE | PIFYFYLESP | TIVASESHDS  | LPFVGTTIRA  | MQVIYVNRFS | QTSRKNAVHE | IKRKASCDRE  | PRLLLFPEGT | TTNGKVLISF | 268 |
| <i>Cs</i> LPEAT2b | VVSNHVSYLE | PIFYFYLESP | TIVASESHDS  | LPFVGTTIRA  | MQVIYVNRFS | QTSRKNAVHE | IKRKASCDRE  | PRLLLFPEGT | TTNGKVLISF | 264 |
| <i>Cs</i> LPEAT2c | VVSNHVSYLE | PIFYFYLESP | TIVASESHDS  | LPFVGTTIRA  | MQVIYVNRFS | QTSRKNAVHE | IKRKASCDRE  | PRLLLFPEGT | TTNGKVLISF | 268 |
| <i>At</i> LPEAT2  | QLGAFIPGY  | IQPVVRYPH  | VHFDQSWGNI  | SLTLMFRMF   | TOFHNFEVE  | YLPVIYPSEK | QKQNAVRLSQ  | KTSHAATSE  | NVVQTSHSFA | 353 |
| <i>Cs</i> LPEAT2a | QLGAFIPGY  | IQPVVRYPH  | VHFDQSWGNI  | SLVLMFRMF   | TOFHNFEVE  | YLPVIYPSEK | QKQNAVRLSQ  | KTSQAIAASL | NVVQTSHSYA | 358 |
| <i>Cs</i> LPEAT2b | QLGAFIPGY  | IQPVVRYPH  | VHFDQSWGNI  | SLVLMFRMF   | TOFHNFEVE  | YLPVIYPSEK | QKQNAVRLSQ  | KTSQAIAASL | NVVQTSHSYA | 354 |
| <i>Cs</i> LPEAT2c | QLGAFIPGY  | IQPVVRYPH  | VHFDQSWGNI  | SLVLMFRMF   | TOFHNFEVE  | YLPVIYPSEK | QKQNAVRLSQ  | KTSHAIAASL | NVVQTSHSYA | 358 |
| <i>At</i> LPEAT2  | DLMLLNKATE | LKLENPSNYM | VEMARYESLF  | HVSSLEATRE  | LDTEVSMNPD | SSGRVRLHDF | LRGLKLKPCP  | LSKRIFEEFD | VEKVGSITFK | 443 |
| <i>Cs</i> LPEAT2a | DLMLLNKATE | LKLENPSNYM | VEMAKYESLF  | HISSELEATRE | LDTEVSMNPD | SSGRVRLHDF | LWGLRLKPCCT | LSKRIFEEFD | VEKVGSITFK | 448 |
| <i>Cs</i> LPEAT2b | DLMLLNKATE | LKLENPSNYM | VEMAKYESLF  | HISSELEATRE | LDTEVSMNPD | SSGRVRLHDF | LWGLRLKPCCT | LSKRIFEEFD | VEKVGSITFK | 444 |
| <i>Cs</i> LPEAT2c | DLMLLNKATE | LKLENPSNYM | VEMAKYESLF  | HISSELEATRE | LDTEVSMNPD | SSGRVRLHDF | LWGLRLKPCCT | LSKRIFEEFD | VEKVGSITFK | 448 |
| <i>At</i> LPEAT2  | QFLFASGHVL | TQPLFQQTCE | LAFSHCDADG  | DGYTTQELG   | EALKNTIPNL | NKDEIRGMVH | LLDDDDQDERI | SQNDLLSCLR | RNPLLAFIFA | 533 |
| <i>Cs</i> LPEAT2a | QFLFASGHVL | TQPLFQQTCE | LVFESHCDRDG | DGYTTQELG   | DAIKNTIPNL | NKADIQGTYN | LLDDDDQDERI | SQNDLLTCLR | RNPLLAFIFA | 538 |
| <i>Cs</i> LPEAT2b | QFLFASGHVL | TQPLFQQTCE | LVFESHCDRDG | DGYTTQELG   | DAIKNTIPNL | NKAEIQGMVY | LLDDDDQDERI | SQNDLLTCLR | RNPLLAFIFA | 534 |
| <i>Cs</i> LPEAT2c | QFLFASGHVL | TQPLFQQTCE | LVFESHCDRDG | DGYTTQELG   | DAIKNTIPNL | NKAEIQGMVY | LLDDDDQDERI | SQNDLLTCLR | RNPLLAFIFA | 538 |
| <i>At</i> LPEAT2  | PDAPT      |            |             |             |            |            |             |            |            | 539 |
| <i>Cs</i> LPEAT2a | PDAPT      |            |             |             |            |            |             |            |            | 544 |
| <i>Cs</i> LPEAT2b | PDAPT      |            |             |             |            |            |             |            |            | 540 |
| <i>Cs</i> LPEAT2c | PDAPT      |            |             |             |            |            |             |            |            | 544 |

**Supplementary Figure S4.** Amino acid sequences' annotation of *Cs*LPEAT2 isoforms and *At*LPEAT2. LPE-binding site amino acids are denoted by golden arrows above. Ca<sup>2+</sup>-binding protein domain is framed by a silver line.



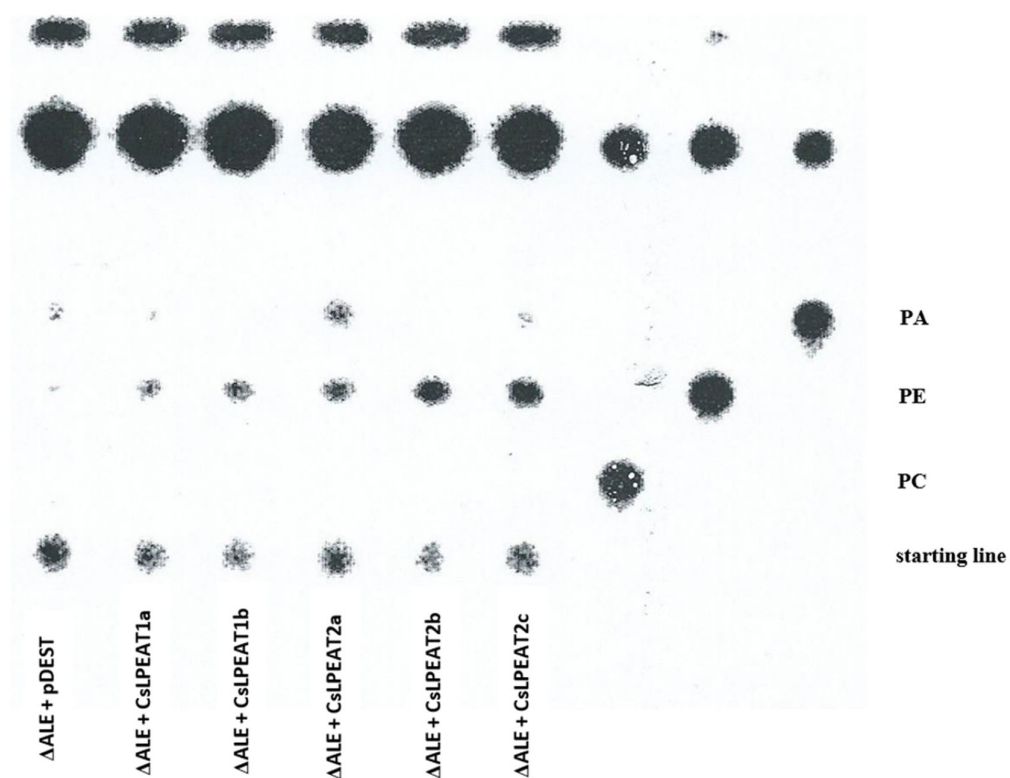

**Supplemental Figure S5.** Complementation of PE synthesis *via* LPEAT pathway in *S. cerevisiae* transformants overexpressed with cloned *CsLPEAT1a.1*, *CsLPEAT1a.2*, *CsLPEAT2a*, *CsLPEAT2b* and *CsLPEAT2c* isoforms. Figure presents the results of radioisotope assay analysed by Instant Imager, Packard Instrument Co. Assay was done with addition of 18:1-LPE and 18:1-CoA. The first line presents negative control ( $\Delta ALE$  strain) incapable to synthesize PE *via* LPEAT pathway. Radiolabeled standards of each phospholipids were obtained via enzymatic reaction conducted with wild strain BY4742.

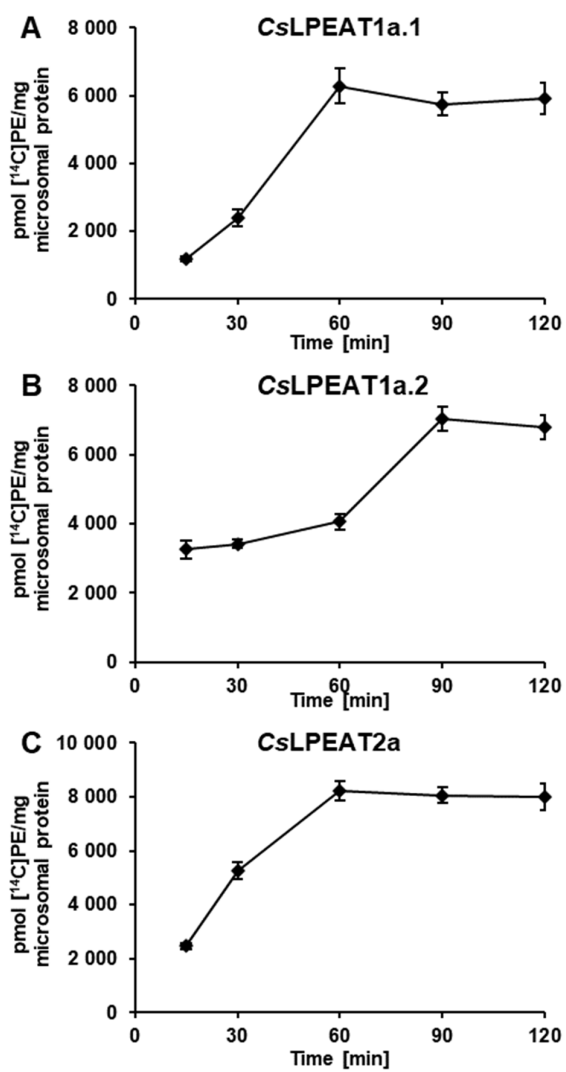



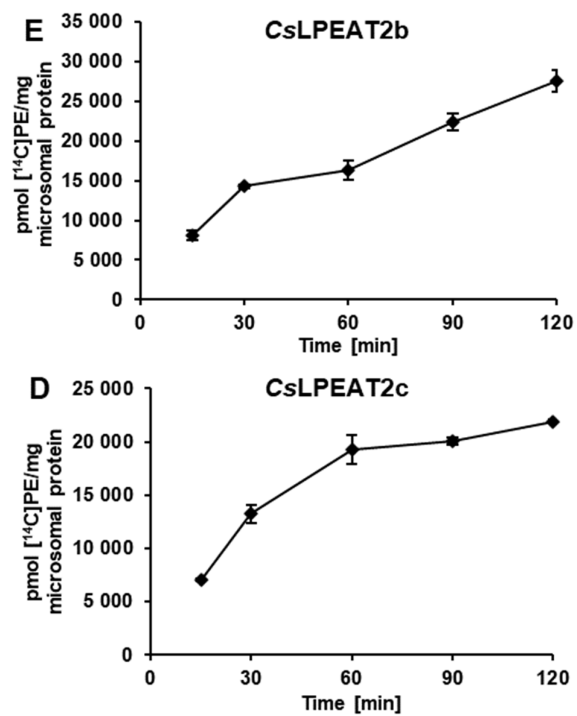

**Supplemental Figure S6.** Effects of reaction time on the activity of various variants of acyl-CoA:lysophosphatidylethanolamine acyltransferases (LPEATs). Mean values and SD are presented (data from at least three independent assays).

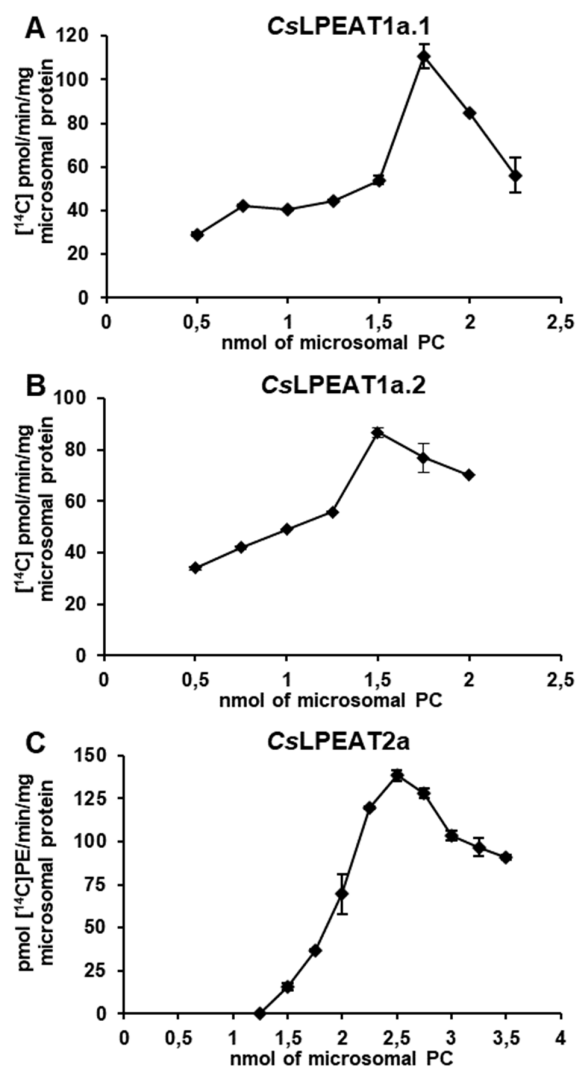

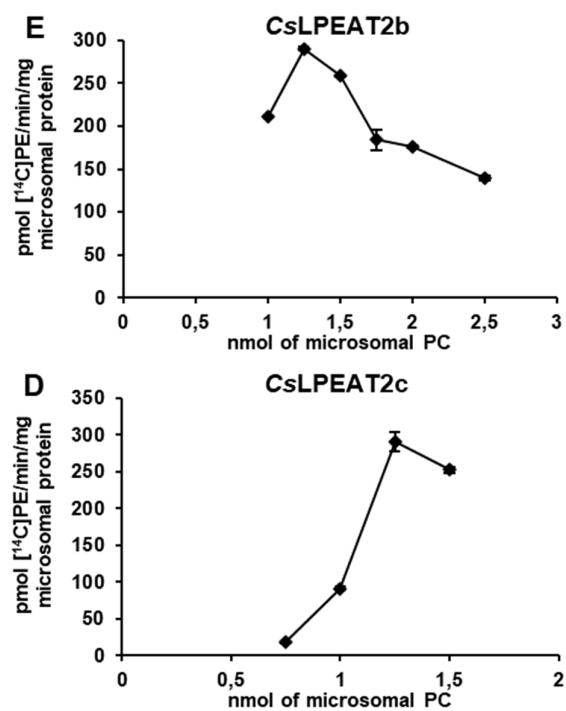

**Supplemental Figure S7.** Effects of amount of microsomal fraction on the activity of various isoforms of acyl-CoA:lysophosphatidylethanolamine acyltransferases (LPEATs). Mean values and SD are presented (data from at least three independent assays).
